# Supplementary material for: Cardiac arrest triggers hippocampal neuronal death through autophagic and apoptotic pathways
Source: PubMed Central journal article supplement (PMC4897701; doi:10.1038/srep27642), 2016-06-08

## Cardiac arrest triggers hippocampal neuronal death through autophagic and apoptotic pathways

Derong Cui, M.D., Ph.D.<sup>1, 3 †</sup>, Hanbing Shang, M.D., Ph.D.<sup>2 †</sup>, Xiaoli Zhang, M.D.<sup>1</sup>, Wei Jiang, M.D., Ph.D.<sup>1</sup>, Xiaofeng Jia, M.D., Ph.D.<sup>3, 4, 5, 6\*</sup>

(† these authors contributed equally to this work)

### Legends

**Figure S1.** Autophagosome formation following CA examined by transmission electron microscopy (TEM). (AA) normal hippocampal neurons; (AB) Mitochondrial swelling 1.5 h after ROSC; (AC) Growth and presence of double-membrane structure which contains mitochondria, or vacuoles (C-shaped), and chromatin condensation were observed at 3 h after ROSC. (AD) Increased number of vacuoles (C-shaped) or double membranes structure and lysosomes was observed at 6 h after ROSC. (AE) At 12 h after ROSC, cell exhibited apoptotic features including blebbing, cell shrinkage, and chromatin pyknosis. (AF) Cells exhibited both apoptosis and necrosis 24 h after ROSC. (B) Quantified autophagosomes lysosomes and intact mitochondria, in the CA and sham groups.  $n = 6$ . \* $p < 0.05$  vs. sham group; N, nucleus; Broad arrows represent autophagosomes; Narrow arrows denote lysosomes; Black arrowheads indicate mitochondria; Scale bar = 1  $\mu\text{m}$ .

**Figure S2.** Representative fluorescent images of doubly-stained LC3-II (green) with NeuN (red) in the hippocampal CA1 subregion at 1.5, 3, 6, 12 and 24 h after ROSC and DAPI counterstaining of nuclei (blue). LC3-II staining was indistinct in the CA1 of the sham rats. 6-24 h after ROSC,

the staining was intense in the cytosol of CA1 showing a punctate appearance. After 6-24 h following ROSC, LC3 was predominantly seen in NeuN-expressing pyramidal neurons of the hippocampal CA1, confirmed by superimposed images from the same field. Scale bar, 50  $\mu\text{m}$ .

**Figure S3.** Representative images of dual-labeled fluorescence of p53 (red) with Beclin-1 (green) in the hippocampal CA1 subregion at 3, 6, 12 and 24 h after ROSC and DAPI counterstaining of nuclei (blue). p53 and Beclin-1 staining was indistinguishable in the CA1 subregion of the non-ischemic brains (sham). 3-24 h after ROSC, the staining was stronger and appeared punctate in the cytosol of the CA1. 3-24 h after ROSC, p53 was predominantly localized to Beclin-1-expressing pyramidal neurons in CA1, confirmed by superimposed images from the same field. Scale bar, 50  $\mu\text{m}$ .

**Figure S4.** Effects of 3-MA on hippocampal injury following CA at different time points after ROSC. Rats were pre-treated with 600 nmol 3-MA at 1.5, 3, and 6 h after ROSC and were euthanized for fluorescent morphological analyses at 12 h after ROSC. (1) Sham treatment. (2) CA + DMSO treatment. (3) CA + 3-MA treatment 1.5 h after ROSC. (4) CA + 3-MA treatment 3 h after ROSC. (5) CA + 3-MA treatment 6 h after ROSC. Representative images of dual-label fluorescence of LC3-II (green) with NeuN (red) in CA1 at 12h post-resuscitation and counterstaining of nuclei with DAPI (blue). LC3-II staining was indistinct in the CA1 of the sham animals. 12 h after ROSC, the intensity and punctate appearance increased in the cytosol of CA1. Rats treated with 3-MA at 3 h and 6 h after ROSC were compared with those treated with 3-MA 1.5 h after ROSC. NeuN immunoreactivity (red) marked the neurons. LC3-II were predominantly localized to NeuN-expressing pyramidal neurons in CA1, confirmed using superimposed images

from the same field. Scale bar, 50  $\mu\text{m}$ .

Fig. S1

A

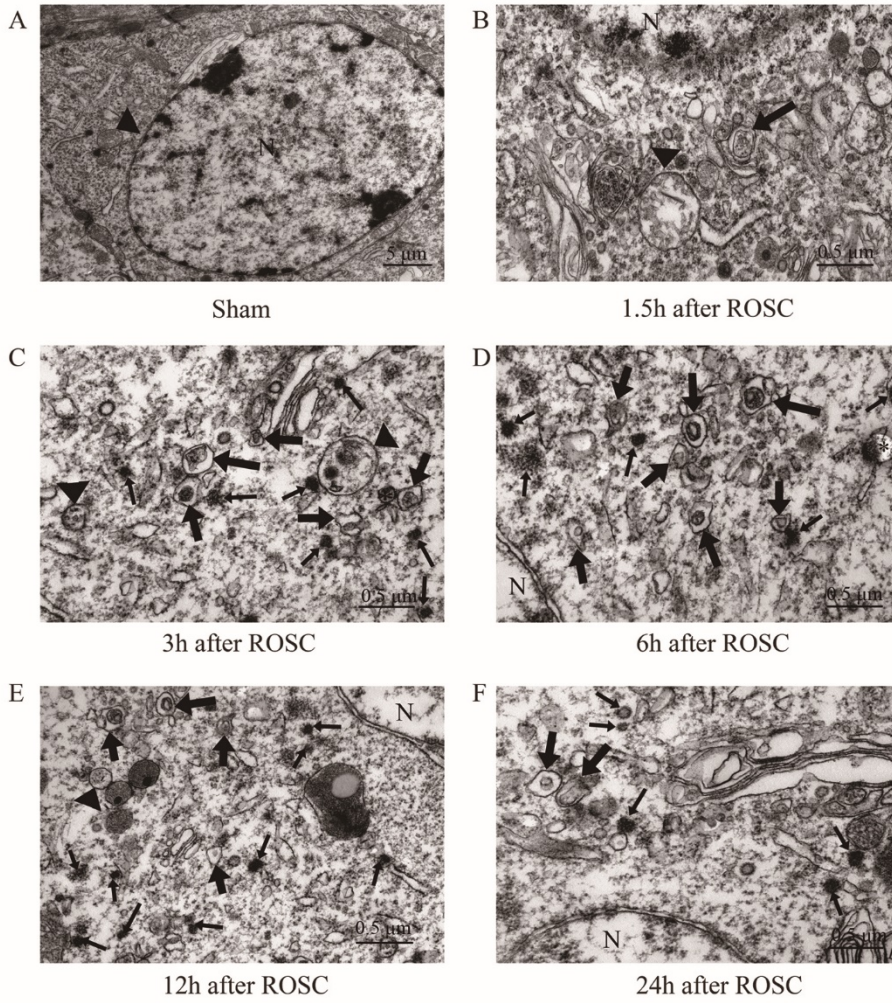

B

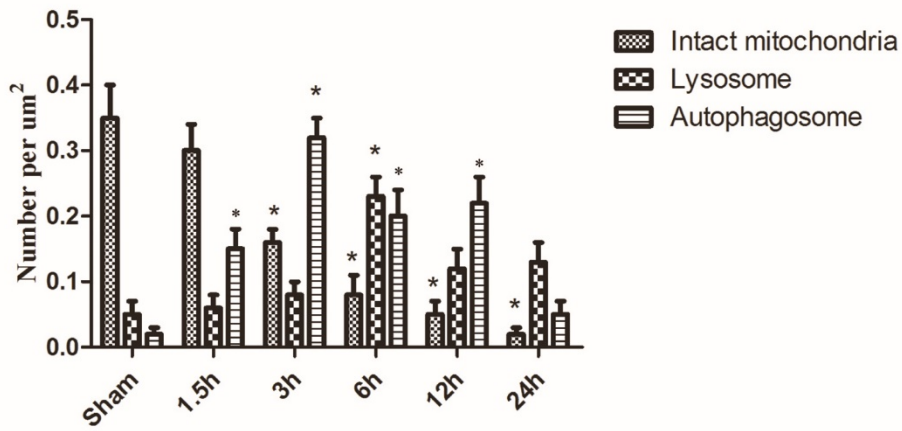

Fig. S2

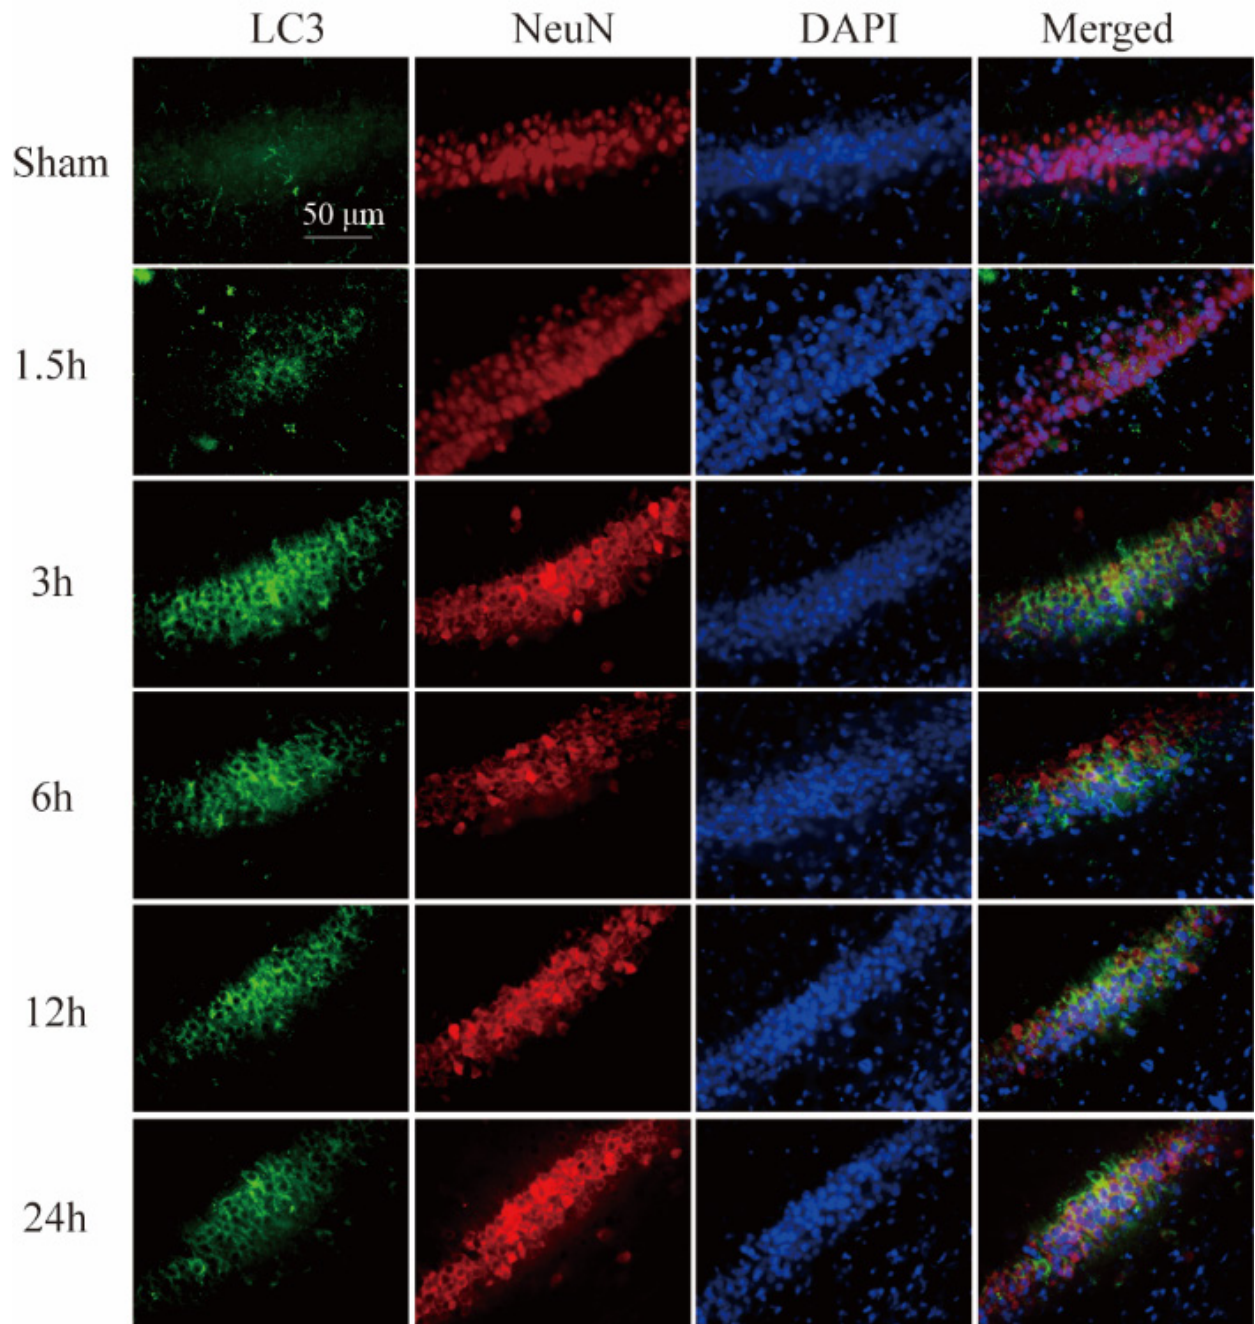



Fig. S3

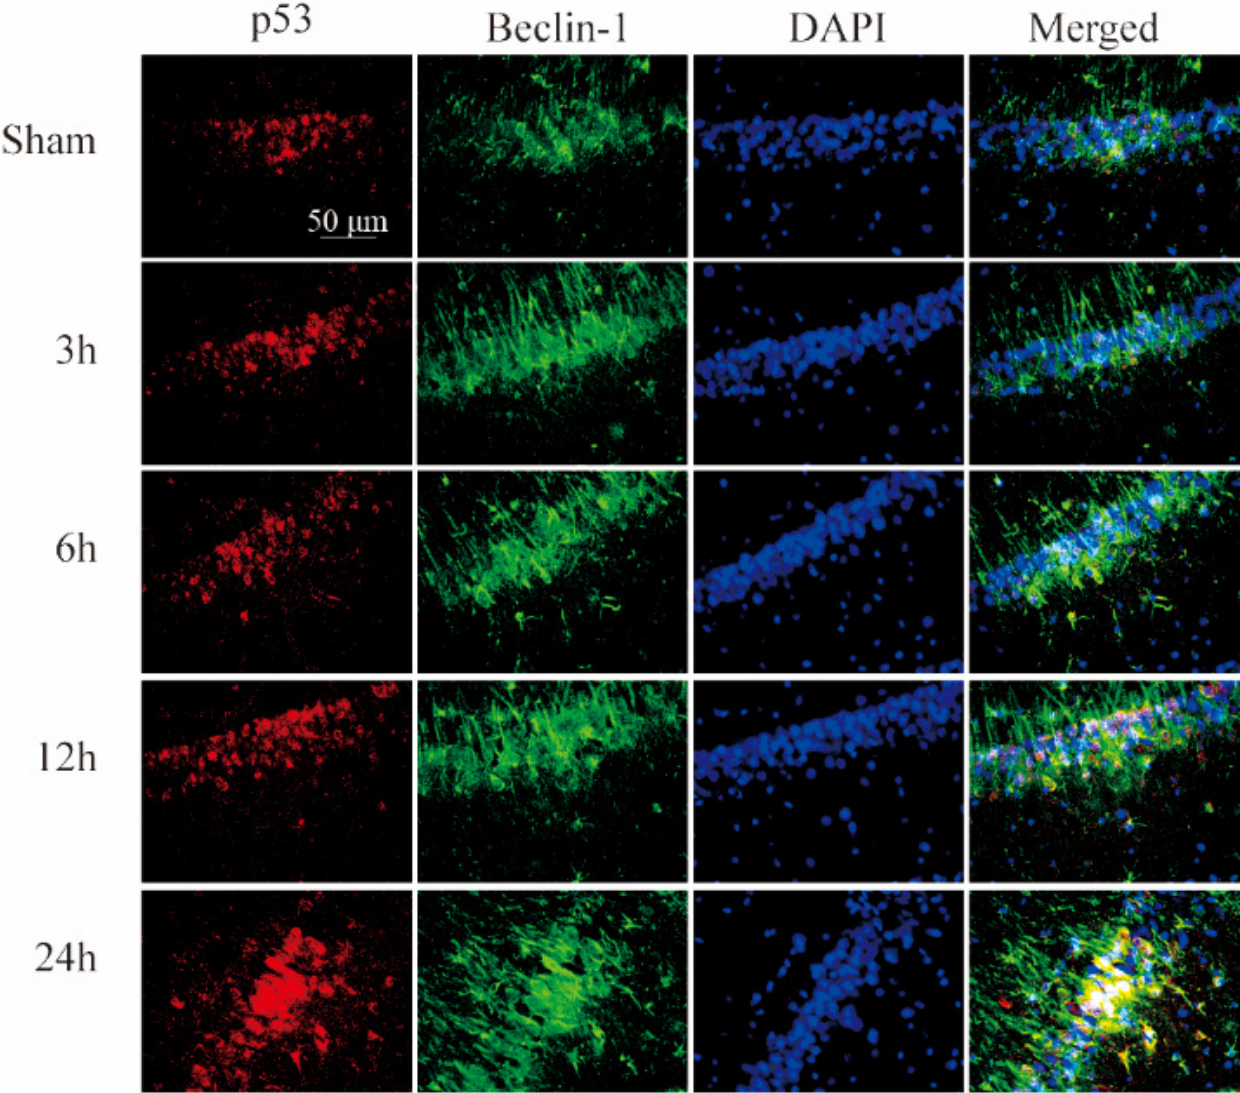

Fig. S4

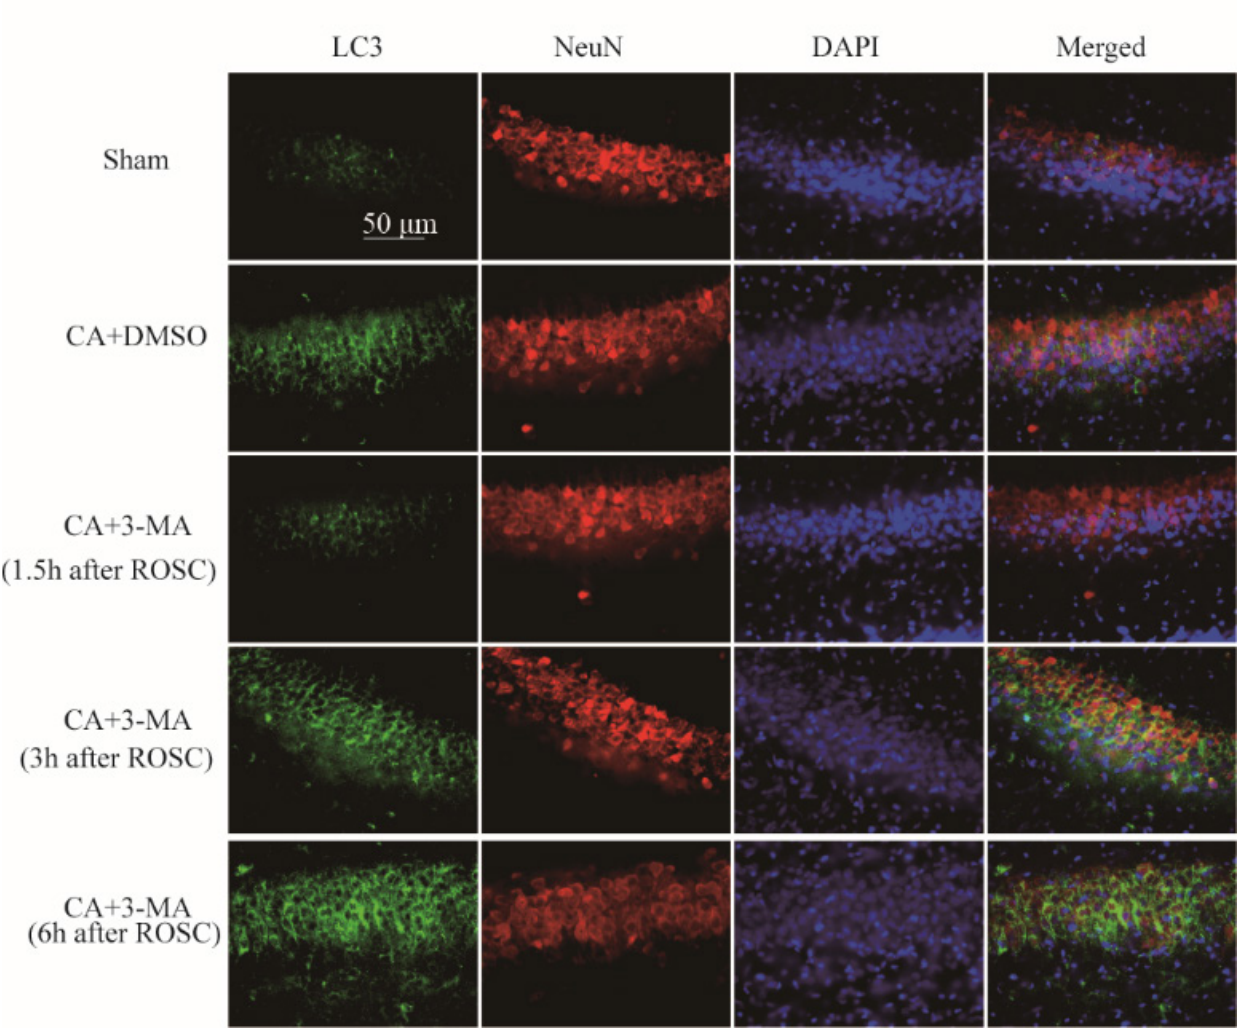

Supplement: srep27642-s1.pdf [file srep27642-s1.pdf]
